# Supplementary material for: Sequence similarity of SARS-CoV-2 and humans: Implications for SARS-CoV-2 detection
Source: Front Genet. 2022 Jul 22;13:946359. doi: 10.3389/fgene.2022.946359 (PMC9355506; doi:10.3389/fgene.2022.946359)
Supplement: Supplementary file 1 [file Table2.XLSX]

## Sheet: Sheet1
genelist		GO analysis
TMEM198B		Category	Term	Description	LogP	InTerm_InList	Genes	Symbols
WASH3P		GO Cellular Components	GO:0030173	integral component of Golgi membrane	-4.1944	3/63	8460,166929,261729	TPST1,SGMS2,STEAP2
BAZ1A		GO Biological Processes	GO:0098876	vesicle-mediated transport to the plasma membrane	-3.39789	3/117	9135,261729,374666,51290	RABEP1,STEAP2,WASH3P,ERGIC2
LOC105373591		GO Cellular Components	GO:0000151	ubiquitin ligase complex	-2.21507	3/304	80012,84961,197131	PHC3,FBXL20,UBR1
LOC645177
FBXL20
C3orf38
GLO1
LOC105379085
ZNF485
RBM18
SC5D
STEAP2
PHC3
PPIP5K2
NCOA3		KEGG analysis
XKR5		#Term	Database	ID	Input number	Background number	P-Value	Corrected P-Value	Input	Hyperlink
REEP3		Estrogen signaling pathway	KEGG PATHWAY	hsa04915	2	138	0.00694848	0.111176	NCOA3|KRT14	http://www.genome.jp/kegg-bin/show_pathway?hsa04915/hsa:3861%09red/hsa:8202%09red
PCNX4		Steroid biosynthesis	KEGG PATHWAY	hsa00100	1	19	0.0176754	0.125412	SC5D	http://www.genome.jp/kegg-bin/show_pathway?hsa00100/hsa:6309%09red
THAP9		Pyruvate metabolism	KEGG PATHWAY	hsa00620	1	39	0.0350472	0.125412	GLO1	http://www.genome.jp/kegg-bin/show_pathway?hsa00620/hsa:2739%09red
DHX8		Basal transcription factors	KEGG PATHWAY	hsa03022	1	45	0.0402003	0.125412	TAF3	http://www.genome.jp/kegg-bin/show_pathway?hsa03022/hsa:83860%09red
SGMS2		Sphingolipid metabolism	KEGG PATHWAY	hsa00600	1	47	0.041912	0.125412	SGMS2	http://www.genome.jp/kegg-bin/show_pathway?hsa00600/hsa:166929%09red
LOC107986674		Mineral absorption	KEGG PATHWAY	hsa04978	1	53	0.0470295	0.125412	STEAP2	http://www.genome.jp/kegg-bin/show_pathway?hsa04978/hsa:261729%09red
LOC107987097		Endocrine resistance	KEGG PATHWAY	hsa01522	1	98	0.0845731	0.162557	NCOA3	http://www.genome.jp/kegg-bin/show_pathway?hsa01522/hsa:8202%09red
KRT17P2		Phosphatidylinositol signaling system	KEGG PATHWAY	hsa04070	1	99	0.0853908	0.162557	PPIP5K2	http://www.genome.jp/kegg-bin/show_pathway?hsa04070/hsa:23262%09red
KRT17P1		Thyroid hormone signaling pathway	KEGG PATHWAY	hsa04919	1	119	0.101598	0.162557	NCOA3	http://www.genome.jp/kegg-bin/show_pathway?hsa04919/hsa:8202%09red
TAF3		Sphingolipid signaling pathway	KEGG PATHWAY	hsa04071	1	119	0.101598	0.162557	SGMS2	http://www.genome.jp/kegg-bin/show_pathway?hsa04071/hsa:166929%09red
LOC107984257		Spliceosome	KEGG PATHWAY	hsa03040	1	135	0.114362	0.165093	DHX8	http://www.genome.jp/kegg-bin/show_pathway?hsa03040/hsa:1659%09red
ERGIC2		Breast cancer	KEGG PATHWAY	hsa05224	1	147	0.12382	0.165093	NCOA3	http://www.genome.jp/kegg-bin/show_pathway?hsa05224/hsa:8202%09red
SERPINE3		Metabolic pathways	KEGG PATHWAY	hsa01100	3	1433	0.135012	0.166169	SC5D|SGMS2|GLO1	http://www.genome.jp/kegg-bin/show_pathway?hsa01100/hsa:166929%09red/hsa:6309%09red/hsa:2739%09red
RABEP1		Endocytosis	KEGG PATHWAY	hsa04144	1	244	0.19675	0.224857	RABEP1	http://www.genome.jp/kegg-bin/show_pathway?hsa04144/hsa:9135%09red
SLC39A10		Herpes simplex virus 1 infection	KEGG PATHWAY	hsa05168	1	492	0.357421	0.379102	ZNF709	http://www.genome.jp/kegg-bin/show_pathway?hsa05168/hsa:163051%09red
MOV10L1		Pathways in cancer	KEGG PATHWAY	hsa05200	1	530	0.379102	0.379102	NCOA3	http://www.genome.jp/kegg-bin/show_pathway?hsa05200/hsa:8202%09red
MACIR
KRT14
TENT5A
ZNF709
UBR1
TPST1
DSG4
KIAA1841
PURG
DLGAP2
